# Supplementary material for: Laser Ablated Periodic Nanostructures on Titanium and Steel Implants Influence Adhesion and Osteogenic Differentiation of Mesenchymal Stem Cells
Source: PubMed Central journal article supplement (PMC7475978; doi:10.3390/ma13163526), 2020-08-10
Supplement: materials-13-03526-s001.pdf [file materials-13-03526-s001.pdf]

# Laser Ablated Periodic Nanostructures on Titanium and Steel Implants Influence Adhesion and Osteogenic Differentiation of Mesenchymal Stem Cells

Kai Oliver Böker <sup>1,\*</sup>, Frederick Kleinwort <sup>2</sup>, Jan-Hendrick Klein-Wiele <sup>2</sup>, Peter Simon <sup>2</sup>, Katharina Jäckle <sup>1</sup>, Shahed Taheri <sup>1</sup>, Wolfgang Lehmann <sup>1</sup> and Arndt F. Schilling <sup>1</sup>

<sup>1</sup> Department for Trauma Surgery, Orthopaedics and Plastic Surgery, University Medical Center Goettingen, Robert Koch Straße 40, 37075 Göttingen, Germany; katharina.jaeckle@med.uni-goettingen.de (K.J.); shahed.taheri@med.uni-goettingen.de (S.T.); Wolfgang.Lehmann@med.uni-goettingen.de (W.L.); arndt.schilling@med.uni-goettingen.de (A.F.S.)

<sup>2</sup> Laser-Laboratorium Göttingen e.V. (LLG), Hans-Adolf-Krebs-Weg 1, 37077 Göttingen, Germany; frederick.kleinwort@llg-ev.de (F.K.); jhkw@llg-ev.de (J.-H.K.-W.); peter.simon@llg-ev.de (P.S.)

\* Correspondence: kai.boeker@med.uni-goettingen.de; Tel.: +49-(0)-551-39-22613

**Table S1:** Linear structure depths D1-D5 on steel plates measured by AFM.

| Structure | 1-1    | 1-2    | 1-3    | 1-4    | 1-5    |
|-----------|--------|--------|--------|--------|--------|
| Steel     | 200 nm | 360 nm | 550 nm | 710 nm | 880 nm |
| Titanium  | 200 nm | 320 nm | 420 nm | 530 nm | 700 nm |

**Table S2:** *Osteocalcin* statistical test.

| Tukey's Multiple Comparison Test       | Mean Diff. | q      | Significant? $p < 0.05?$ | Summary |
|----------------------------------------|------------|--------|--------------------------|---------|
| Control plastic vs. Diff plastic       | -1.624     | 7392   | Yes                      | ***     |
| Control steel vs. Diff steel           | -1.587     | 7574   | Yes                      | ***     |
| Control steel vs. Diff steel 1-5       | -0.2221    | 1011   | No                       | ns      |
| Control steel vs. Diff steel 2-5       | -0.3903    | 1863   | No                       | ns      |
| Control steel vs. Diff steel 5-5       | -0.5811    | 2734   | No                       | ns      |
| Control titanium vs. Diff titanium     | -1.331     | 6056   | Yes                      | **      |
| Control titanium vs. Diff titanium 1-5 | -0.07189   | 0.3382 | No                       | ns      |
| Control titanium vs. Diff titanium 2-5 | -0.2168    | 0.9867 | No                       | ns      |
| Control titanium vs. Diff titanium 5-5 | -0.3832    | 1803   | No                       | ns      |

**Table S3:** *Collagen 1* statistical test.

| Tukey's Multiple Comparison Test    | Mean Diff. | q     | Significant? $p < 0.05?$ | Summary |
|-------------------------------------|------------|-------|--------------------------|---------|
| Control plastic vs. Diff plastic    | -0.6554    | 5.485 | Yes                      | **      |
| Control steel vs. Diff steel        | -0.7635    | 6.702 | Yes                      | ***     |
| Diff steel vs. Diff steel 1-5       | 0.5378     | 4.502 | No                       | ns      |
| Diff steel vs. Diff steel 2-5       | 0.6118     | 5.371 | Yes                      | *       |
| Diff steel vs. Diff steel 5-5       | 0.7835     | 6.779 | Yes                      | ***     |
| Control titanium vs. Diff titanium  | -0.4104    | 3.602 | No                       | ns      |
| Diff titanium vs. Diff titanium 1-5 | 0.4562     | 3.947 | No                       | ns      |
| Diff titanium vs. Diff titanium 2-5 | 0.3187     | 2.757 | No                       | ns      |
| Diff titanium vs. Diff titanium 5-5 | 0.3418     | 2.957 | No                       | ns      |

Table S4: RUNX2 statistical test.

| Tukey's Multiple Comparison Test    | Mean Diff. | q     | Significant? $p < 0.05?$ | Summary |
|-------------------------------------|------------|-------|--------------------------|---------|
| Control plastic vs. Diff plastic    | -1.583     | 6.298 | Yes                      | **      |
| Control steel vs. Diff steel        | -2.000     | 8.203 | Yes                      | ***     |
| Diff steel vs. Diff steel 1-5       | 1.703      | 6.658 | Yes                      | ***     |
| Diff steel vs. Diff steel 2-5       | 1.708      | 7.005 | Yes                      | ***     |
| Diff steel vs. Diff steel 5-5       | 1.711      | 6.915 | Yes                      | ***     |
| Control titanium vs. Diff titanium  | -1.530     | 6.276 | Yes                      | **      |
| Diff titanium vs. Diff titanium 1-5 | 1.239      | 5.010 | Yes                      | *       |
| Diff titanium vs. Diff titanium 2-5 | 0.5775     | 2.258 | No                       | ns      |
| Diff titanium vs. Diff titanium 5-5 | 1.142      | 4.618 | No                       | ns      |

Table S5: Aggrecan statistical test.

| Tukey's Multiple Comparison Test    | Mean Diff. | q      | Significant? $p < 0.05?$ | Summary |
|-------------------------------------|------------|--------|--------------------------|---------|
| Control plastic vs. Diff plastic    | 0.6275     | 6.947  | Yes                      | ***     |
| Control steel vs. Diff steel        | 0.8696     | 1.010  | Yes                      | ***     |
| Diff steel vs. Diff steel 1-5       | 0.06209    | 0.6874 | No                       | ns      |
| Diff steel vs. Diff steel 2-5       | 0.09927    | 1.153  | No                       | ns      |
| Diff steel vs. Diff steel 5-5       | 0.01721    | 0.1969 | No                       | ns      |
| Control titanium vs. Diff titanium  | 1.178      | 1.367  | Yes                      | ***     |
| Diff titanium vs. Diff titanium 1-5 | -0.1279    | 1.464  | No                       | ns      |
| Diff titanium vs. Diff titanium 2-5 | -0.1929    | 2.135  | No                       | ns      |
| Diff titanium vs. Diff titanium 5-5 | 0.05360    | 0.6224 | No                       | ns      |

Table S6: Collagen 2 statistical test.

| Tukey's Multiple Comparison Test    | Mean Diff. | q      | Significant? $p < 0.05?$ | Summary |
|-------------------------------------|------------|--------|--------------------------|---------|
| Control plastic vs. Diff plastic    | 0.4287     | 4.406  | No                       | ns      |
| Control steel vs. Diff steel        | 0.2925     | 3.153  | No                       | ns      |
| Diff steel vs. Diff steel 1-5       | 0.1781     | 1.831  | No                       | ns      |
| Diff steel vs. Diff steel 2-5       | 0.1885     | 2.032  | No                       | ns      |
| Diff steel vs. Diff steel 5-5       | 0.08937    | 0.9494 | No                       | ns      |
| Control titanium vs. Diff titanium  | 0.2760     | 2.836  | No                       | ns      |
| Diff titanium vs. Diff titanium 1-5 | -0.3775    | 4.010  | No                       | ns      |
| Diff titanium vs. Diff titanium 2-5 | -0.5897    | 6.060  | No                       | ns      |
| Diff titanium vs. Diff titanium 5-5 | -0.09301   | 0.9880 | No                       | ns      |

Table S7: Sox9 statistical test.

| Tukey's Multiple Comparison Test   | Mean Diff. | q     | Significant? $p < 0.05?$ | Summary |
|------------------------------------|------------|-------|--------------------------|---------|
| Control plastic vs. Diff plastic   | -0.3593    | 5.499 | Yes                      | **      |
| Control plastic vs. Control steel  | -0.07352   | 1.125 | No                       | ns      |
| Control steel vs. Diff steel       | -0.1894    | 2.897 | No                       | ns      |
| Diff steel vs. Diff steel 1-5      | 0.03785    | 0.552 | No                       | ns      |
| Diff steel vs. Diff steel 2-5      | 0.1487     | 2.276 | No                       | ns      |
| Diff steel vs. Diff steel 5-5      | 0.03908    | 0.589 | No                       | ns      |
| Control titanium vs. Diff titanium | -0.1630    | 2.494 | No                       | ns      |

|                                     |          |       |    |    |
|-------------------------------------|----------|-------|----|----|
| Diff titanium vs. Diff titanium 1-5 | 0.1778   | 2.681 | No | ns |
| Diff titanium vs. Diff titanium 2-5 | -0.07077 | 1.013 | No | ns |
| Diff titanium vs. Diff titanium 5-5 | -0.1728  | 2.606 | No | ns |

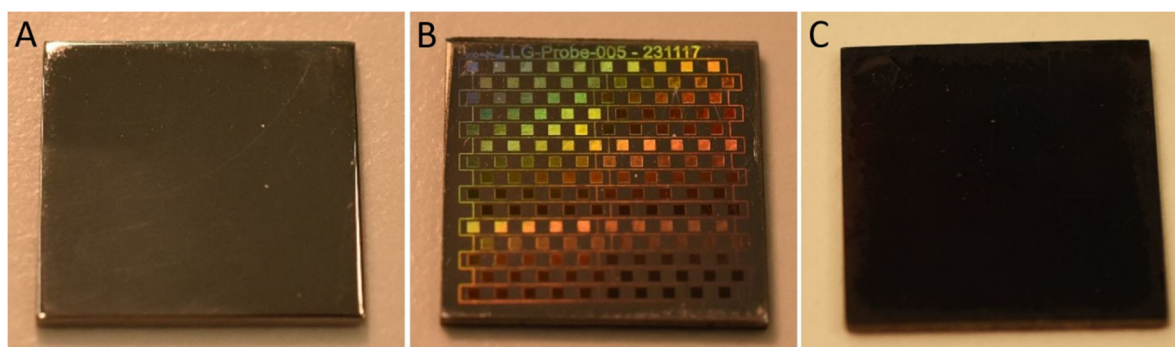

**Figure S1:** Representation of non-treated plates (A), laser-structured plates with 30 different structure types and depths (B), and fully structured plates (C).

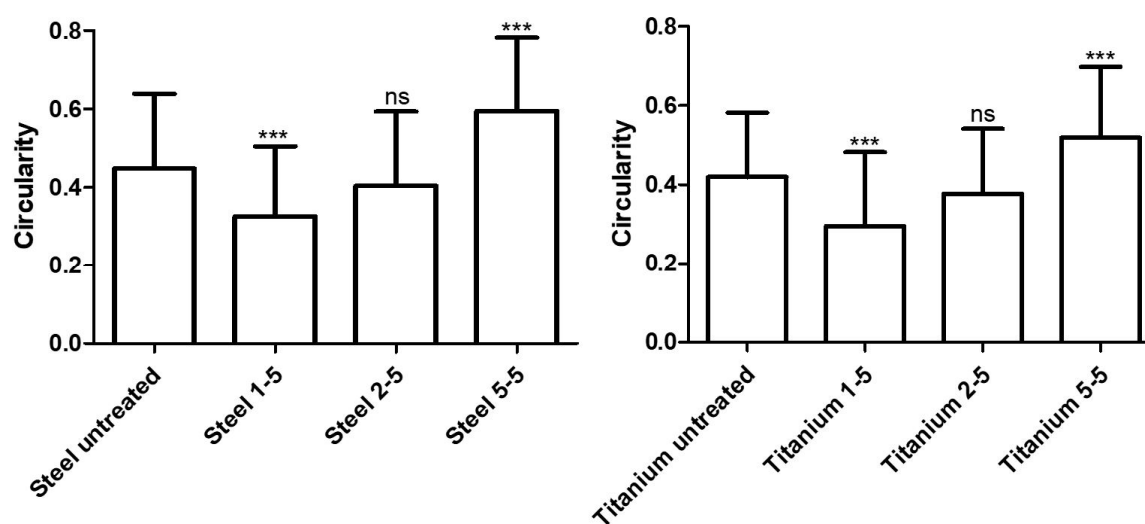

**Figure S2:** Circularity of SCP1 cells on different surfaces. Structure 1-5 decreased the circularity of cells on titanium and steel plates compared to non-structured control surfaces while structure 5-5 increased circularity. A circularity of 1.0 indicates a perfect circle, while a circularity closer to 0.0 indicates an increasingly elongated polygon.

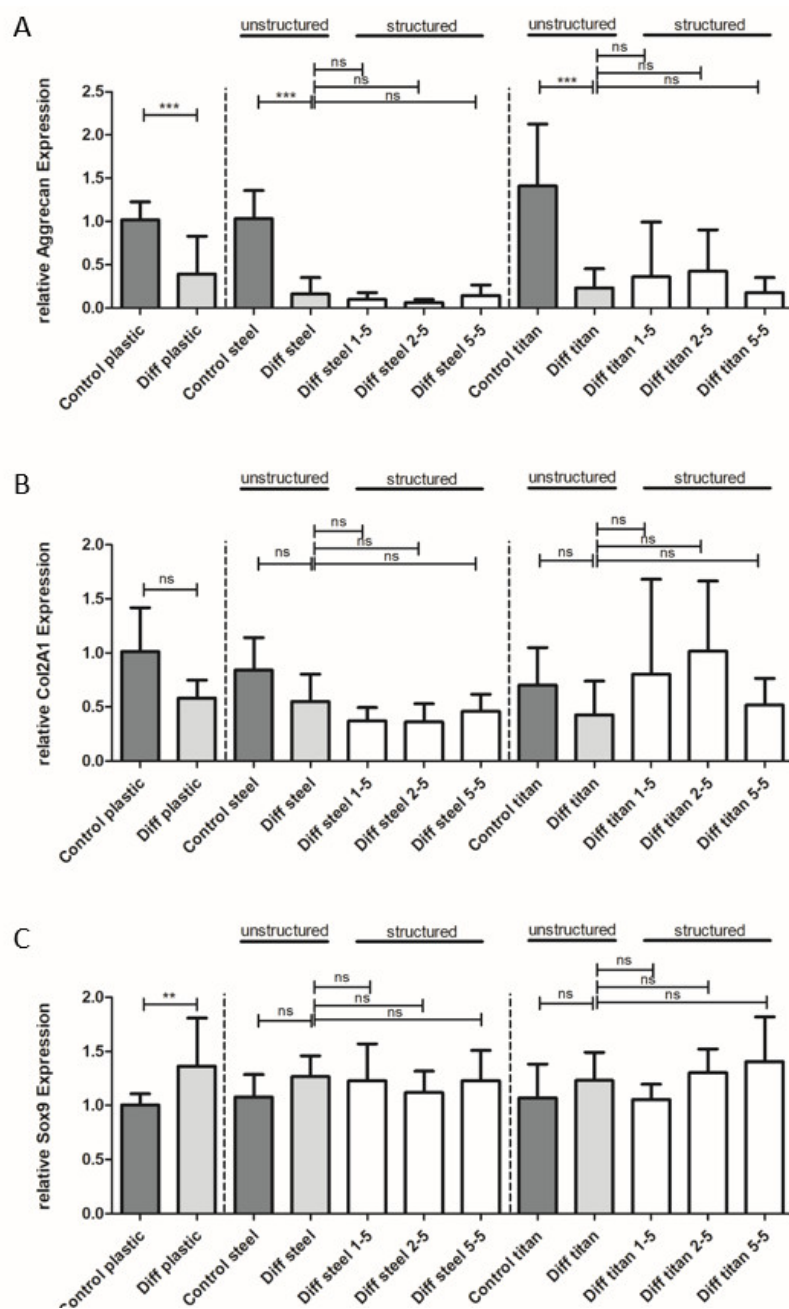

**Figure S3:** The influence of plate structure on chondrogenic genes after osteogenic differentiation. Gene expression analysis of chondrogenic genes was performed after 4 weeks of differentiation of human mesenchymal stem cells. *Aggrecan* expression (A) was reduced upon osteogenic differentiation on polystyrene, steel, and titanium plates, while plate structuring showed no difference on *Aggrecan* expression. *Collagen 2* expression (B) was not affected upon osteogenic differentiation, neither by the surface type (polystyrene, steel, titanium), nor through structuring. *Sox9* expression (C) was increased by osteogenic differentiation on polystyrene surfaces, while no change was observed on steel or titanium plates. \*\* ( $p < 0.005$ ), \*\*\* ( $p < 0.0005$ ), ns (non-significant).
